# Supplementary material
Source: Springer Nature journal article supplement (https://www.springermedizin.de/resource/supplementary/12914_2008_70_MOESM5_ESM.pdf/9537448)

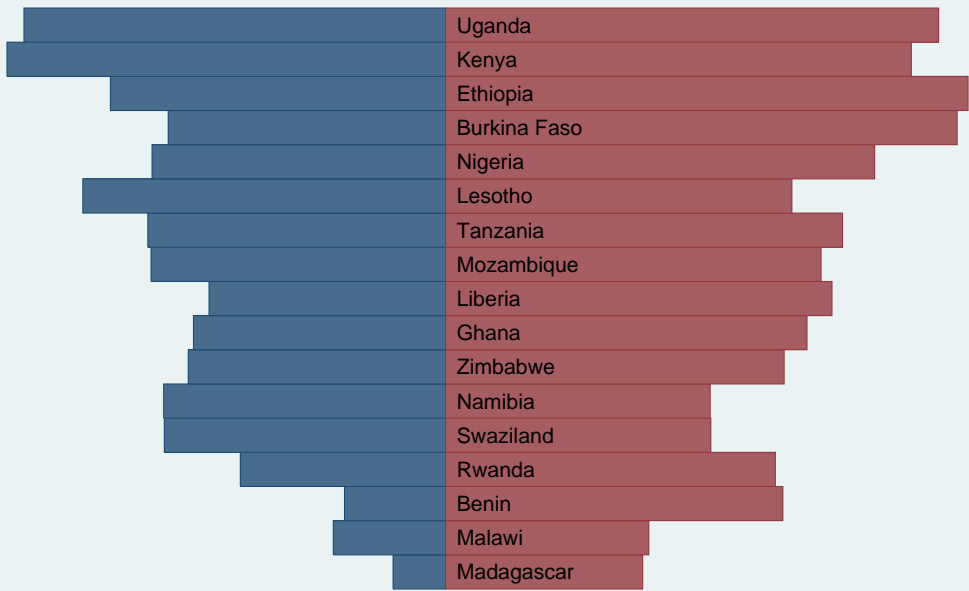

60 40 20 Acceptance of wife beating 20 40 60

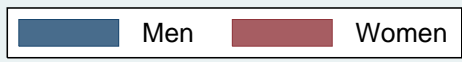

Supplement: MOESM5 [file 9537448]
